# Supplementary material
Source: publisher figshare collection journal article supplement (https://acs.figshare.com/ndownloader/files/31633916)
Supplement: Supplementary file 1 [file 31633916]

## Sheet: Skyline MS Upload and List
				Copy these columns into Skyline
	Disease	Disease	Experimental		Mol.				Compendium
	Name	Abbreviation	Notes	List	Name	Formula	Adduct	Charge	or NCSU CCS	Label
				Agilent Tune Mix (+)	Betaine	C5H11NO2	M+H	1	121.3
				Agilent Tune Mix (+)	ATM 322	C6H18N3O6P3	M+H	1	153.73
				Agilent Tune Mix (+)	ATM 622	C12H18F12N3O6P3	M+H	1	202.96
				Agilent Tune Mix (+)	ATM 922	C18H18F24N3O6P3	M+H	1	243.64
				Agilent Tune Mix (+)	ATM 1222	C24H18F36N3O6P3	M+H	1	282.2
				Agilent Tune Mix (+)	ATM 1522	C30H18F48N3O6P3	M+H	1	316.96
Smears/No CCS	Ornithine transcarbamylase deficiency	OTC		Amino acids & others	Alanine (ALA)	C3H7NO2	M+H	1
	Argininemia	Arg		Amino acids & others	Arginine (ARG)	C6H14N4O2	M+Na	1	148.592
				Amino acids & others	Arginine (ARG)	C6H14N4O2	M+H	1	136.584
				Amino acids & others	Histidine (HIS)	C6H9N3O2	M+H	1	131.731
				Amino acids & others	Histidine (HIS)	C6H9N3O2	M+Na	1	134.635
				Amino acids & others	Lysine (LYS)	C6H14N2O2	M+H	1	131.363
				Amino acids & others	Lysine (LYS)	C6H14N2O2	M+Na	1	135.482
				Amino acids & others	Threonine (THR)	C4H9NO3	M+H	1	126.71
				Amino acids & others	Asparagine (ASN)	C4H8N2O3	M+Na	1	129.455
				Amino acids & others	Glutamate (GLU)	C5H9NO4	M+H	1	131.058
Smears/No CCS	Non ketotic hyperglycinemia	NKH		Amino acids & others	Glycine (GLY)	C2H5NO2	M+H	1
				Amino acids & others	Proline (PRO)	C5H9NO2	M+H	1	125.096
				Amino acids & others	Valine (VAL)	C5H11NO2	M+H	1	120.871
				Amino acids & others	Valine (VAL)	C5H11NO2	M+Na	1	133.404
	Maple Syrup Urine Disease	MSUD		Amino acids & others	Isoleucine (ILE)	C6H13NO2	M+H	1	133.032
	Maple Syrup Urine Disease	MSUD		Amino acids & others	Leucine (LEU)	C6H13NO2	M+H	1	134.847
	Homocystinuria	HCY		Amino acids & others	Methionine (MET)	C5H11NO2S	M+H	1	133.111
	Phenylketonuria	PKU		Amino acids & others	Phenylalanine (PHE)	C9H11NO2	M+Na	1	138.331
				Amino acids & others	Phenylalanine (PHE)	C9H11NO2	M+H	1	140.168
	Tyrosinemia	TYR-I/II		Amino acids & others	Tyrosine (TYR)	C9H11NO3	M+Na	1	143.624
				Amino acids & others	Tyrosine (TYR)	C9H11NO3	M+H	1	145.76
				Amino acids & others	Tryptophan (TRP)	C11H12N2O2	M+Na	1	147.726
				Amino acids & others	Tryptophan (TRP)	C11H12N2O2	M+H	1	150.27
	Maple Syrup Urine Disease	MSUD		Amino acids & others	trans-4-hydroxy-L-Proline (OHPRO)	C5H9NO3	M+H	1	127.934
	Maple Syrup Urine Disease	MSUD		Amino acids & others	D-allo-Isoleucine (AILE)	C6H13NO2	M+H	1	132.7
			Lose 1 H for charge	Amino acids & others	Choline	C5H13NO	M+H	1	117.6
	Guanidinoacetate methyltransferase deficiency	GAMT		Amino acids & others	Creatine (CRE)	C4H9N3O2	M+H	1	126
	Hyperammonemia-Hyperornithinemia	HHH		Amino acids & others	Ornithine (ORN)	C5H12N2O2	M+H	1	127.7
				Amino acids & others	Homocitrulline (HOMOCIT)	C7H15N3O3	M+H	1
	Citrullinemia, Type 1	CIT		Amino acids & others	Citrulline (CIT)	C6H13N3O3	M+H	1	137.66
				Amino acids & others	Citrulline (CIT)	C6H13N3O3	M+Na	1	139.431
	5-Oxoprolinuria			Amino acids & others	Oxoproline (OXOPRO)	C5H7NO3	M+H	1	130.3
				Amino acids & others	Thyroxine (T4)	C15H11I4NO4	M+H	1	216.6
				Amino acids & others	Pipecolate (PIPA)	C6H11NO2	M+H	1	127.8
				Amino acids & others	Pipecolate (PIPA)	C6H11NO2	M+Na	1	139.1
				Amino acids & others	Argininosuccinate (ASA)	C10H18N4O6	M+H	1
	Not observed by ESI (typically derivatized in current workflows)			Amino acids & others	Succinylacetone (SUAC)	C7H10O4	M+H	1
	( See https://doi.org/10.1016/j.cca.2009.06.017 for SUAC)			Amino acids & others	Sarcosine (SARC)	C3H7NO2	M+H	1
			No reported M+H	Amino acids & others	Serine (SER)	C3H7NO3	M+H	1
				Amino acids & others	Formiminoglutamic acid (FIGLU)	C6H10N2O4	M+H	1
	Guanidinoacetate methyltransferase deficiency	GAMT		Amino acids & others	Guanidinoacetic acid (glycocyamine)	C3H7N3O2	M+H	1	124.9
	Guanidinoacetate methyltransferase deficiency	GAMT		Amino acids & others	Guanidinoacetic acid (glycocyamine)	C3H7N3O2	M+Na	1	134.6
	X-linked adrenoleukodystrophy	X-ALD	Avaliable: Avanti	Amino acids & others	26:0-lyso-PC (C26:0-LPC)	C34H70NO7P	M+H	1
			Add H for simplicity	Amino acids & others	Heme	C34H31FeN4O4	M+H	1	241.462
				Amino acids & others	ADENOSINE	C10H13N5O4	M+H	1	155.551
				Amino acids & others	ADENOSINE	C10H13N5O4	M+H	1	161.36
			separate entries	Amino acids & others	DEOXYADENOSINE	C10H13N5O3	M+H	1	152.312
			for 5'deoxyaden.	Amino acids & others	DEOXYADENOSINE	C10H13N5O3	M+H	1	158.062
				Amino acids & others	DEOXYGUANOSINE	C10H13N5O4	M+H	1	171.65
				Amino acids & others	INOSINE	C10H12N4O5	M+H	1	170.78
	Carnitine uptake defect	CUD		Carnitines	Free Carnitine (C0)	C7H15NO3	M+H	1	132.871
				Carnitines	Free Carnitine (C0)	C7H12H'3NO3	M+H	1	132.8	heavy
				Carnitines	Acetyl-carnitine (C2)	C9H17NO4	M+H	1	143.356
				Carnitines	Acetyl-carnitine (C2)	C9H14H'3NO4	M+H	1	143.267	heavy
	Metylmalonic aciduria	MMA-Mut		Carnitines	Propionyl-carnitine (C3)	C10H19NO4	M+H	1	148.59
				Carnitines	Propionyl-carnitine (C3)	C10H16H'3NO4	M+H	1	148.7	heavy
	Short-chain acyl-CoA dhydroganse deficiency	SCAD		Carnitines	Butyryl-carnitine (C4)	C11H21NO4	M+H	1	154.589
				Carnitines	Isobutyryl-carnitine (iC4)	C11H21NO4	M+H	1	153.618
				Carnitines	Isobutyryl-carnitine (iC4)	C11H18H'3NO4	M+H	1	153.6	heavy
	Beta-ketothiolase deficiency	BKT		Carnitines	Tiglyl-carnitine (C5:1)	C12H21NO4	M+H	1	159.062
				Carnitines	3-methylcrotonyl-carnitine (iC5:1)	C12H21NO4	M+H	1	159.659
				Carnitines	Isovaleryl-carnitine (iC5)	C12H23NO4	M+H	1	159.906
	Isovaleric acidemia	IVA		Carnitines	Valeryl-carnitine (C5)	C12H23NO4	M+H	1	160.894
				Carnitines	Valeryl-carnitine (C5)	C12H20H'3NO4	M+H	1	161.2	heavy
				Carnitines	2-methylbutyryl-carntine (mC5)	C12H23NO4	M+H	1	158.566
Avaliable				Carnitines	Malonyl-carnitine (C3DC)	C10H17NO6	M+H	1
No Standard	Medium chain L-3-hydoxyacyl-CoA dehydrogenase deficiency	MCHAD		Carnitines	3-Hydroxybutyryl-carntine (C4OH)	C11H21NO5	M+H	1
				Carnitines	Hexanoyl-carnitine (C6)	C13H25NO4	M+H	1	166.878
	Medium-chain acyl-CoA dehydrogenase deficiency	MCAD		Carnitines	Hexanoyl-carnitine (C6)	C13H22H'3NO4	M+H	1	166.8	heavy
				Carnitines	Methylmalonyl-carnitine (iC4DC)	C11H19NO6	M+H	1	157.471
				Carnitines	Succinyl-carnitine (C4DC)	C11H19NO6	M+H	1	156.914
				Carnitines	3-hydroxyisovaleryl-carnitine (iC5OH)	C12H23NO5	M+H	1	160.57
	Glutaric aciduria I	GA-I		Carnitines	Glutaryl-carnitine (C5DC)	C12H21NO6	M+H	1	160.79
	3-Hydroxy-3-methylglutaryl-CoA lyase deficiency	HMG		Carnitines	Hydroxyhexanoyl-carnitine (C6OH)	C13H25NO5	M+H	1	167.862
	Medium-chain acyl-CoA dehydrogenase deficiency	MCAD		Carnitines	Octanoyl-carnitine (C8)	C15H29NO4	M+H	1	178.883
				Carnitines	Octanoyl-carnitine (C8)	C15H26H'3NO4	M+H	1	178.7	heavy
				Carnitines	Adipoyl-carnitine (C6DC)	C13H23NO6	M+H	1	165.612
	Avaliable from Avanti			Carnitines	Methylglutaryl-carnitine (iC6DC)	C13H23NO6	M+H	1
	Avaliable from Supelco/Sigma			Carnitines	3-Hydroxyoctanoly-carnitine (C8OH)	C15H29NO5	M+H	1
	No known standard			Carnitines	Decadienoyl-carnitine (C10:2)	C17H29NO4	M+H	1
				Carnitines	trans-2-decenoyl-carnitine (tC10:1)	C17H31NO4	M+H	1	192.363
	Medium-chain acyl-CoA dehydrogenase deficiency	MCAD		Carnitines	Decanoyl-carnitine (C10)	C17H33NO4	M+H	1	189.523
				Carnitines	Suberyol-carnitine (C8DC)	C15H27NO6	M+H	1	174.008
				Carnitines	trans-2-dodecenoyl-carnitine (C12:1)	C19H35NO4	M+H	1	202.178
				Carnitines	Lauroyl-carnitine (C12)	C19H37NO4	M+H	1	198.525
				Carnitines	Lauroyl-carnitine (C12)	C19H34H'3NO4	M+H	1	198.1	heavy
				Carnitines	Sebacoyl-carnitine (C10DC)	C17H31NO6	M+H	1	182.719
				Carnitines	3-Hydroxydodecanoyl-carnitine (C12OH)	C19H37NO5	M+H	1	206.66
				Carnitines	Tetradecadienoyl-carnitine (C14:2)	C21H37NO4	M+1	1
				Carnitines	trans-2-tetradecenoyl-carnitine (C14:1)	C21H39NO4	M+H	1	209.382
	Very long-chain acyl-CoA dehydrogenase deficiency	VLCAD		Carnitines	Myristoyl-carnitine (C14)	C21H41NO4	M+H	1	206.059
				Carnitines	Myristoyl-carnitine (C14)	C21H38H'3NO4	M+H	1	206.059	heavy
				Carnitines	3-Hydroxytetradecanoyl-carnitine (C14OH)	C21H41NO5	M+H	1	216.429
	Carnitine Uptake Defect	CUD		Carnitines	Palmitoyl-carnitine (C16)	C23H45NO4	M+H	1	213.135
				Carnitines	Palmitoyl-carnitine (C16)	C23H42H'3NO4	M+H	1	213.239	heavy
	Long chain-L-3-hydroxyacyl-CoA dehydrogenase deficiency	LCHAD		Carnitines	3-Hydroxyhexadecanoyl-carnitine (C16OH)	C23H45NO5	M+H	1	223.145
				Carnitines	3-hydroxyhexadecenoyl-carnitine (C16:1-OH)	C23H43NO5	M+H	1
				Carnitines	Oleoyl-carnitine (C18:1)	C25H47NO4	M+H	1	215.74
	Carnitine palmitoyltransferase deficiency type II	CPT II		Carnitines	Stearoyl-carnitine (C18)	C25H49NO4	M+H	1	220.187
				Carnitines	Stearoyl-carnitine (C18)	C25H46H'3NO4	M+H	1	220.4	heavy
				Carnitines	3-Hydroxyoctadecenoyl-carnitine (C18:1-OH)	C25H47NO5	M+H	1
	Avalialbe from Sigma			Carnitines	3-Hydroxystearoyl-carnitine (C18OH)	C25H49NO5	M+H	1
				Carnitines	arachidonyl carnitine (Arach)	C27H45NO4	M+H	1	214.893
				Carnitines	cis,cis-5,8-tetradecandienoyl-L-carnitine	C21H37NO4	M+H	1	197.28
	Congenital Adrenal Hyperplasia	CAH		NBS Steroids	11-deoxycortisol (11DC)	C21H30O4	M+H	1	188.124
	Congenital Adrenal Hyperplasia	CAH		NBS Steroids	21-Deoxycortisol (21DC)	C21H30O4	M+H	1	184.596
	Congenital Adrenal Hyperplasia	CAH		NBS Steroids	Corticosterone	C21H30O4	M+H	1	187.22
				NBS Steroids	Cortisone	C21H28O5	M+H	1	188.686
				NBS Steroids	Aldosterone	C21H28O5	M+H	1	187.818
	Congenital Adrenal Hyperplasia	CAH		NBS Steroids	11-Deoxycorticosterone (11DOC)	C21H30O3	M+H	1	186.669
	Congenital Adrenal Hyperplasia	CAH		NBS Steroids	17a-hydroxyprogesterone (17OHP)	C21H30O3	M+H	1	183.448
				NBS Steroids	Cortisol	C21H30O5	M+H	1	188.629
	*Note- While all analytes listed here are not identical to all NBS analytes currently screened, the list was composed of analytes based on standards avalibale and components noted to be highly abundant in the DBS (e.g. Choline, Heme, etc.)
	Disorder/Metabolite References
	1. "Newborn Screening Coding and Terminology Guide." https://lhncbc.nlm.nih.gov/newbornscreeningcodes/
	2. Ozben, T. "Expanded newborn screening and confirmatory follow-up testing for inborn errors of metabolism detected by tandem mass spectrometry." Clin. Chem. Lab Med. 2013, 51, 157-176.
	3. Rinaldo, P.; Cowan, T. M.; Matern, D.; "Acylcarnitine Profile Analysis." Genetics in Medicine, 2008, 10, 151-156
	4. Sahai, I. and D. Marsden "Newborn screening" Crit. Rev. Clin. Lab. Sci. 2009, 46, 55-82.
	5. Janzen, N.; Peter, M.; Sander, s.; Steuerwald, U.; Terhardt, M.; Holtkamp, U; Sander, J. "Newborn Screening for Congenital Adrenal Hyperplasia: Additional Steroid Profile using Liquid Chromatography-Tandem Mass Spectrometry." J. Clin. Endocrinol. Metab., 2007. 92, 2581-2589.
	6. Hubbard, W. C. et. al. "Newborn screening for X-Linked adrenoleukodystrophy (X-ALD): Validation of a combined liquid chromatography-tandem mass spectrometric (LC-MS/MS) method." Molecular Genetics and Metabolism, 2009, 97, 212-220.
	7. Asef, C. K.; Khaksarfard, K. M.; De Jesus, V. R. "A Non-Derivitized Assay for the Simulataneous Detection of Amino Acids, Acylcaarnitines, Succinylacetone, Creatine, and Guanidinoacetic Acid in Dried Blood Spots via Tandem Mass Spectrometry." Int. J. Neonatal Screen. 2016, 2, 13; doi:10.3390/ijns2040013
				Agilent Tune Mix (-)	ATM 301	C6H2ON3F9	M-H	-1	140.04
				Agilent Tune Mix (-)	ATM 601	C12H2ON3F21	M-H	-1	180.77
				Agilent Tune Mix (-)	ATM 1033	C20H19O8N3P3F27	M-H	-1	255.34
				Agilent Tune Mix (-)	ATM 1333	C26H19O8N3P3F39	M-H	-1	284.76
				Agilent Tune Mix (-)	ATM 1633	C32H19O8N3P3F51	M-H	-1	319.03

## Sheet: Newborn Screening Codes
			NBS Analytes: "Newborn Screening Coding and Terminology Guide." https://lhncbc.nlm.nih.gov/newbornscreeningcodes/
			Compound	Acronynm	Investigated Previously?	CCS?	IMS Notes
		Amino Acids and Amino Acid like molecules (30)	Allo-isoleucine	AILE	Yes	Yes	Needs run
			Alanine	ALA	Yes	No	CCS Compendium, smearing
			Arginine	ARG	Yes	Yes	CCS Compendium
			Arginosuccinate	ASA	No	No	Needs run
			Asparagine	ASN	Yes	Yes	CCS Compendium
			Aspartate	ASP	Yes	No	Negative mode only (not cited here)
			Beta alanine	BALA	Yes	No	CCS Compendium, smearing
			Citrulline	CIT	Yes	Yes	CCS Compendium
			Glutamate	GLU	Yes	Yes	CCS Compendium
			Glycine	GLY	Yes	No	CCS Compendium, smearing
			Histidine	HIS	Yes	Yes	CCS Compendium
			Homocitrulline	HOMOCIT	No	No	Not purchased
			Isoleucine	ILE	Yes	Yes	CCS Compendium
			Leucine	LEU	Yes	Yes	CCS Compendium
			Lysine	LYS	Yes	Yes	CCS Compendium
			Methionine	MET	Yes	Yes	CCS Compendium
			Hydroxyproline	OHPRO	Yes	Yes	CCS Compendium
			Ornithine	ORN	Yes	Yes	CCS Compendium
			5-oxoproline	OXOPRO	Yes	Yes	CCS Compendium
			Phenylalanine	PHE	Yes	Yes	CCS Compendium
			Pipecolate	PIPA	Yes	Yes	CCS Compendium
			Proline	PRO	Yes	Yes	CCS Compendium
			Sarcosine	SARC	Yes	No	CCS Compendium, smearing
			Serine	SER	Yes	No	CCS Compendium, no M+H, obs. M+Na
			Succinylacetone	SUAC	No	No	Examined here, not ionized by ESI
			Threonine	THR	Yes	Yes	CCS Compendium
			Tryptophan	TRP	Yes	Yes	CCS Compendium
			Tyrosine	TYR	Yes	Yes	CCS Compendium
			Valine	VAL	Yes	Yes	CCS Compendium
			Formiminoglutamic acid	FIGLU	No	No	No standard
		Acylcarnitines (41)	Carnitine	C0	Yes	Yes	CCS Compendium (and here)
			Aceylcarnitine	C2	Yes	Yes	CCS Compendium (and here)
			Propionylcarnitine	C3	No	Yes	Current Work
			Acrylylcarnitine	C3:1	No	No	No standard
			Malonylcarnitine	C3-DC	No	No	Needs run?
			Butyrylcarnitine	C4	No	Yes	Current Work
			3-Hydroxybutyrylcarnitine	C4-OH	No
			Isovalerylcarnitine	C5	No	Yes	Would expect C5 to be valerylcarnitine
			Tiglylcarnitine	C5:1	No	Yes	Current Work
			Glutarylcarnitine	C5-DC	Yes	Yes	CCS Compendium (and here)
			3-Hydroxyisovalerylcarnitine	C5-OH	No	Yes	Current Work
			Methylglutarylcarnitine	C6-DC	No	No	Check?
			3-Hydroxyhexanoylcarnitine	C6-OH	No	Yes	Current Work
			Octanoylcarnitine	C8	No	Yes	Current Work
			Octenoylcarnitine	C8:1	No	No
			3-Hydroxyoctanoylcarnitine	C8-OH	No	No	Check?
			Decanoylcarnitine	C10	No	Yes	Current Work
			Decenoylcarnitine	C10:1	No	Yes	Current Work
			3-Hydroxydecenoylcarnitine	C10:1-OH	No	No
			Decadienoylcarnitine	C10:2	No	No
			3-Hydroxydecanoylcarnitine	C10-OH	No	No
			Dodecnoylcarnitine	C12	Yes	Yes	CCS Compendium (and here)
			Dodecenoylcarnitine	C12:1	No	Yes	Current Work
			3-Hydroxydodecenoylcarnitine	C12:1-OH	No	No
			3-Hydroxydodecanoylcarnitine	C12OH	No	Yes	Current Work
			Tetradecanoylcarnitine	C14	No	Yes	Current Work
			Tetradecenoylcarnitine	C14:1	No	Yes	Current Work
			3-Hydroxytetradecenoylcarnitine	C14:1-OH	No	No
			Tetradecadienoylcarnitine	C14:2	No	No
			3-Hydroxytetradecadienoylcarnitine	C14:2-OH	No	No
			3-Hydroxytetradecanoylcarnitine	C14-OH	No	Yes	Current Work
			Palmitoylcarnitine	C16	Yes	Yes	CCS Compendium (and here)
			Palmitoleylcarnitine	C16:1	No	No
			3-Hydroxypalmitoleylcarnitine	C16:1-OH	No	No
			3-Hydroxypalmitoylcarnitine	C16-OH	No	Yes	Current Work
			Stearoylcarnitine	C18	No	Yes	Current Work
			Oleoylcarnitine	C18:1	No	Yes	Current Work
			3-Hydroxyoleoylcarnitine	C18:1-OH	No	No
			Linoleoylcarnitine	C18:2	No	No
			3-Hydroxylinoleoylcarnitine	C18:2-OH	No	No
			3-Hydroxystearoylcarnitine	C18-OH	No	No
		Steroids	11-Deoxycortisol	11DC	No	Yes	Current Work
			11-Deoxycorticosterone	11DOC	No	Yes	Current Work
			17-Hydroxyprogesterone	17OHP	No	Yes	Current Work
			21-Deoxycortisol	21DC	No	Yes	Current Work
			Androstenedione	Androst	No	No
			Cortisol	Cortis	Yes	Yes	CCS Compendium

## Sheet: Carntine CCS raw data
						Obs.		Single Field	Single Field	Single Field	Reference						A	B	C	Average	RSD				Single Field (Replicate)			Multifield	Multfield	"Gold Standard"							A	A
	Vendor	Subclass	Group	Name	Formula	m/z	Adduct	Dt (A)	Dt (B)	Dt (C)	CCS (A)	Exact m/z	Charge State	Error (ppm)	Deconvoluted mass	γ	S.F. CCS	S.F. CCS	S.F. CCS	S.F. CCS	%		Drift Gas	m/z	Day4 (1574V)	2212021 (1174V)	Day3 (1574V)	CCS (78.24)	Cali. (78.484)	CCS	Exact m/z	Charge State	Error (ppm)	Deconvoluted mass	γ	γ*Ω	Slope (β)	Y int (T Fix)
													1	--	--	--	--	--	--	--	--		28.0061	118.086	14.91	19.88	14.97		--	121.3	118.087	1	4.2274	118.087	0.899055	109.055	0.137281	-0.0168329
													1	--	--	--	--	--	--	--	--			322.048	20.25	26.92	20.3		--	153.73	322.049	1	0.833414	322.049	0.959164	147.452
													1	--	--	--	--	--	--	--	--		Scaling Factor	622.029	27.28	36.26	27.35		--	202.96	622.03	1	1.61857	622.03	0.978221	198.54	B	B
													1	--	--	--	--	--	--	--	--		0.99378	922.008	32.96	43.8	33.05		--	243.64	922.01	1	2.2182	922.01	0.98515	240.022	Slope (β)	Y int (T Fix)
													1	--	--	--	--	--	--	--	--			1221.99	38.24	50.79	38.35		--	282.2	1221.99	1	-0.504423	1221.99	0.988734	279.021	0.181984	0.0762254
													1	--	--	--	--	--	--	--	--			1521.95					--	316.96	1521.97	1	15.8492	1521.97	--	--
													1	--	--	--	--	--	--	--	--																C	C
													1	--	--	--	--	--	--	--	--																Slope (β)	Y int (T Fix)
			C0-D	D-Carnitine	C7H15NO3	162.113	M+H	16.83	22.39	16.87		162.113	1	3.16199	162.113	0.923413	132.896	132.783	132.797	132.825	0.0463125																0.137605	-0.00398916
	Sigma-Aldrich	Linear	C0	L-Carnitine	C7H15NO3	162.113	M+H	16.84	22.4	16.87		162.113	1	-1.77284	162.113	0.923413	132.975	132.843	132.796	132.871	0.0696028
	Sigma-Aldrich	Linear	C2	O-Acetylcarnitine	C9H17NO4	204.123	M+H	18.44	24.53	18.5		204.124	1	0.866142	204.123	0.937737	143.372	143.295	143.4	143.356	0.0379088
	Sigma-Aldrich	Linear	C3	Propionyl-L-carnitine	C10H19NO4	218.14	M+H	19.19	25.52	19.25		218.139	1	-4.46504	218.14	0.941393	148.619	148.517	148.633	148.59	0.042411
	Sigma-Aldrich	Linear	C4	Butyryl-L-carnitine	C11H21NO4	232.155	M+H	20.04	26.64	20.09		232.155	1	-1.39907	232.155	0.944643	154.662	154.521	154.584	154.589	0.045598
	Sigma-Aldrich	isos	iC4	Isobutyryl-L-carnitine	C11H21NO4	232.155	M+H	19.92	26.47	19.96		232.155	1	0.754669	232.155	0.944643	153.737	153.532	153.583	153.618	0.0691924
	Sigma-Aldrich		C5:1	Tigloyl-L-carnitine	C12H21NO4	244.156	M+H	20.68	27.47	20.73		244.155	1	-4.19734	244.156	0.947152	159.174	158.927	159.084	159.062	0.0786144
	Sigma-Aldrich		iC5:1	3-methylcrotonyl-L-carnitine	C12H21NO4	244.156	M+H	20.76	27.58	20.8		244.155	1	-5.01649	244.156	0.947152	159.79	159.566	159.622	159.659	0.073059
	Sigma-Aldrich	isos	iC5	Isovalerylcarnitine	C12H23NO4	246.172	M+H	20.79	27.65	20.84		246.171	1	-4.77555	246.172	0.947552	159.953	159.904	159.861	159.906	0.0287417
	Sigma-Aldrich	Linear	C5	Valerylcarnitine (pentanoylcarntine)	C12H23NO4	246.171	M+H	20.91	27.83	20.97		246.171	1	-3.55688	246.171	0.947552	160.875	160.948	160.858	160.894	0.0296589
	Sigma-Aldrich	m at p2	mC5	2-Methylbutyryl-L-carnitine	C12H23NO4	246.172	M+H	20.62	27.42	20.66		246.171	1	-3.96311	246.172	0.947552	158.646	158.57	158.481	158.566	0.0522431
	Run	Dicarboxylic Acids	C3DC	Malonylcarnitine	C10H17NO6							248.113	1	--	--	--	--	--	--	--	--
	No standard	Hydroxylated	C4OH	3-Hydroxybutylcarnitine	C11H21NO5							248.15	1	--	--	--	--	--	--	--	--
	Sigma-Aldrich	Linear	C6	Hexanoylcarnitine	C13H25NO4	260.187	M+H	21.75	28.94	21.81		260.186	1	-4.32921	260.187	0.950169	166.872	166.924	166.84	166.878	0.0255294
	Sigma-Aldrich	iso-DCs	iC4DC	Methylmalonylcarnitine	C11H19NO6	262.13	M+H	20.54	27.32	20.58		262.129	1	-1.69382	262.13	0.950512	157.539	157.499	157.375	157.471	0.0540843
	Sigma-Aldrich	Dicarboxylic Acids	C4DC	Succinylcarnitine	C11H19NO6	262.13	M+H	20.47	27.19	20.53		262.129	1	-3.60128	262.13	0.950512	157.002	156.747	156.993	156.914	0.0923515
	Sigma-Aldrich	i-OH	iC5OH	3-Hydroxyisovalerylcarnitine	C12H23NO5	262.167	M+H	20.95	27.83	21		262.165	1	-6.33417	262.167	0.950518	160.68	160.446	160.585	160.57	0.0733678
	Sigma-Aldrich	Dicarboxylic Acids	C5DC	Glutarylcarnitine	C12H21NO6	276.146	M+H	21.02	27.95	21.08		276.145	1	-5.4131	276.146	0.952849	160.822	160.745	160.803	160.79	0.0248183
	Sigma-Aldrich	Hydroxylated	C6OH	Hydroxyhexanoylcarnitine	C13H25NO5	276.183	M+H	21.95	29.18	22		276.181	1	-6.19666	276.183	0.952855	167.931	167.838	167.818	167.862	0.0357649
	Sigma-Aldrich	Linear	C8	Octanoylcarnitine	C15H29NO4	288.218	M+H	23.43	31.16	23.49		288.217	1	-2.87283	288.218	0.954691	178.9	178.911	178.837	178.883	0.0221868
	Sigma-Aldrich	Dicarboxylic Acids	C6DC	Adipoyl-L-carnitine	C13H23NO6	290.161	M+H	21.71	28.85	21.75		290.16	1	-3.60352	290.161	0.954975	165.727	165.566	165.543	165.612	0.0604933
	Avaliable	iso-DCs	iC6DC	Methylglutarylcarnitine	C13H23NO6							290.16	1	--	--	--	--	--	--	--	--
	Supelco/Sigma-Expensive	Hydroxylated	C8OH	3-Hydroxyoctanolycarnitine	C15H29NO5							304.212	1	--	--	--	--	--	--	--	--
		Carnitines	C10:2	Decadienoylcarnitine	C17H29NO4							312.217	1	--	--	--	--	--	--	--	--
	Sigma-Aldrich	Trans-2	tC10:1	trans-2-Decenoylcarnitine	C17H31NO4	314.234	M+H	25.3	33.63	25.34		314.233	1	-3.75136	314.234	0.958211	192.459	192.418	192.211	192.363	0.069039
	Sigma-Aldrich	Linear	C10	Decanoylcarnitine	C17H33NO4	316.25	M+H	24.93	33.15	24.97		316.249	1	-5.15291	316.25	0.958461	189.596	189.616	189.356	189.523	0.0765688
	Sigma-Aldrich	Dicarboxylic Acids	C8DC	Suberoyl-L-carnitine	C15H27NO6	318.193	M+H	22.9	30.43	22.94		318.192	1	-3.91965	318.193	0.958699	174.125	173.979	173.921	174.008	0.0605019
	Sigma-Aldrich	Trans-2	C12:1	trans-2-Dodecenoylcarnitine	C19H35NO4	342.265	M+H	26.66	35.48	26.73		342.264	1	-0.527078	342.265	0.961438	202.117	202.346	202.073	202.178	0.0726446
	Sigma-Aldrich	Linear	C12	(Dodecanoylcarnitine) Lauroylcarnitine	C19H37NO4	344.281	M+H	26.2	34.83	26.25		344.28	1	-1.25247	344.281	0.961651	198.587	198.587	198.4	198.525	0.0543449
	Sigma-Aldrich	Dicarboxylic Acids	C10DC	Sebacoyl-L-carnitine	C17H31NO6	346.224	M+H	24.12	32.06	24.17		346.223	1	-4.47342	346.224	0.961854	182.793	182.72	182.643	182.719	0.041027
	Sigma-Aldrich	Hydroxylated	C12OH	3R-3-hydroxydodecanoyl-L-carnitine	C19H37NO5	360.276	M+H	27.32	36.33	27.36		360.275	1	-2.54306	360.276	0.963261	206.725	206.812	206.443	206.66	0.0933523
	Sigma-Aldrich	Trans-2	C14:1	trans-2-Tetradecenoylcarnitine	C21H39NO4	370.297	M+H	27.72	36.81	27.76		370.296	1	-3.4621	370.297	0.964202	209.545	209.346	209.256	209.382	0.0706631
	Sigma-Aldrich	Linear	C14	Myristoylcarnitine (tetradecanoylcarnitine)	C21H41NO4	372.312	M+H	27.28	36.22	27.34		372.311	1	-1.96825	372.312	0.964386	206.182	205.944	206.052	206.059	0.0578098
	Sigma-Aldrich	Hydroxylated	C14OH	3R-3-Hydroxytetradecanoyl-L-carnitine	C21H41NO5	388.307	M+H	28.66	38.15	28.75		388.306	1	-2.10607	388.307	0.965779	216.293	216.628	216.364	216.429	0.0815648
	Sigma-Aldrich	Linear	C16	Palmitoylcarnitine	C23H45NO4	400.344	M+H	28.29	37.56	28.34		400.343	1	-2.83357	400.344	0.966757	213.286	213.055	213.063	213.135	0.0615369
	Sigma-Aldrich	Hydroxylated	C16OH	3R-3-Hydroxyhexadecanoyl-L-carnitine	C23H45NO5	416.338	M+H	29.64	39.39	29.71		416.338	1	-1.48774	416.338	0.967973	223.178	223.176	223.081	223.145	0.02484
	Sigma-Aldrich	cis-9-octadece	C18:1	Oleoylcarnitine	C25H47NO4	426.359	M+H	28.7	38.09	28.74		426.358	1	-2.31073	426.359	0.968691	215.944	215.637	215.639	215.74	0.0819109
	Sigma-Aldrich	Linear	C18	Stearoylcarnitine	C25H49NO4	428.376	M+H	29.28	38.91	29.33		428.374	1	-4.05253	428.376	0.968831	220.273	220.256	220.033	220.187	0.0608754
	Avaliable	Hydroxylated	C18OH	3-Hydroxystearoylcarnitine	C25H49NO5							444.369	1	--	--	--	--	--	--	--	--
		Carnitines	ARCarc	Arachidonyl-L-carnitine	C27H45NO4	448.344	M+H	28.63	38	28.67		448.343	1	-2.53021	448.344	0.970158	215.092	214.801	214.788	214.893	0.0798679

## Sheet: Steroid CCS raw data
			Retention		Obs.		Single Field	Single Field	Single Field	Reference						A	B	C	Average	RSD				Single Field (Replicate)			Multifield	Multfield	"Gold Standard"							A	A
	Name	Formula	Time (A)	Comment	m/z	Adduct	Dt (A)	Dt (B)	Dt (C)	CCS (A)	Exact m/z	Charge State	Error (ppm)	Deconvoluted mass	γ	S.F. CCS	S.F. CCS	S.F. CCS	S.F. CCS	%		Drift Gas	m/z	Rep1	Rep2	Rep3	CCS (78.24)	Cali. (78.484)	CCS	Exact m/z	Charge State	Error (ppm)	Deconvoluted mass	γ	γ*Ω	Slope (β)	Y int (T Fix)
												1	--	--	--	--	--	--	--	--		28.0061	118.086					--	121.3	118.087	1	5.07423	118.087	--	--	0.199342	-0.0645168
												1	--	--	--	--	--	--	--	--			322.048	29.31	29.31	29.31		--	153.73	322.049	1	2.07546	322.049	0.959164	147.452
												1	--	--	--	--	--	--	--	--		Scaling Factor	622.028	39.54	39.54	39.54		--	202.96	622.03	1	1.77934	622.03	0.978221	198.54	B	B
	11-deoxycortisol	C21H30O4			347.222	M+H	36	36.02	36.01		347.222	1	1.50509	347.222	0.961958	188.072	188.176	188.124	188.124	0.0277204		0.99378	922.008	47.79	47.79	47.79		--	243.64	922.01	1	2.32666	922.01	0.98515	240.022	Slope (β)	Y int (T Fix)
	21-Deoxycortisol	C21H30O4			347.224	M+H	35.35	35.32	35.33		347.222	1	-4.25491	347.224	0.961958	184.682	184.526	184.578	184.596	0.0431531			1221.99	55.54	55.54	55.54		--	282.2	1221.99	1	3.01442	1221.99	0.988734	279.021	0.199342	-0.0645168
	Corticosterone	C21H30O4			347.221	M+H	35.83	35.82	35.86		347.222	1	3.23309	347.221	0.961957	187.186	187.134	187.342	187.22	0.0579832								--	316.96	1521.97	1	--	--	--	--
	Cortisone	C21H28O5			361.202	M+H	36.18	36.16	36.17		361.201	1	-0.308969	361.202	0.96335	188.738	188.634	188.686	188.686	0.027598																C	C
	Aldosterone	C21H28O5			361.202	M+H	36	35.99	36.02		361.201	1	-1.13953	361.202	0.96335	187.8	187.748	187.904	187.818	0.0423514																Slope (β)	Y int (T Fix)
	11-Deoxycorticosterone (11-DOC)	C21H30O3			331.228	M+H	35.66	35.65	35.69		331.227	1	-3.59994	331.228	0.960229	186.635	186.582	186.791	186.669	0.0582591																0.199342	-0.0645168
	17a-hydroxyprogesterone (17-OHP)	C21H30O3			331.227	M+H	35.03	35.07	35.05		331.227	1	0.022945	331.227	0.960229	183.343	183.552	183.448	183.448	0.0569565
	Choline	C5H14NO			104.108	M+H	20.8	20.78	20.79	117.553	104.108	1	-1.60027	104.108	0.887702	117.907	117.794	117.851	117.851	0.0479512
